# Supplementary material for: A Human Monoclonal Antibody with Neutralizing Activity against Highly Divergent Influenza Subtypes
Source: PLoS One. 2011 Dec 5;6(12):e28001. doi: 10.1371/journal.pone.0028001 (PMC3230632; doi:10.1371/journal.pone.0028001)
Supplement: Table S1 — HA amino acidic residues mutated in H1 and H3. (DOC) [file pone.0028001.s004.doc]

**Table S1. HA amino acidic residues mutated in H1 and H3.**

| **HA-subtype** | **HA-subunit** | **Residue** |
| --- | --- | --- |
| H1N1 | HA1 | His25 |
| His45 |
| Thr315 |
| Asn336 |
| Ile337 |
| Pro338 |
| HA2 | Trp357 |
| Thr358 |
| Gly359 |
| Met360 |
| Ile361a |
| Asp362 |
| Gly363 |
| Trp364 |
| Thr384 |
| Ile388 |
| Thr392 |
| Val395 |
| Asn396 |
| Glu400 |
| H3N2 | HA1 | Asp18b |
| His25c |
| Asn45d |
| Lys57e |
| Ile70f |
| HA2 | Ile361g |
| Asp362h |

aFor residue Ile361 two HA mutants were generated: Ile361Ala and Ile361Val. See main text for details bAsp18 not present on A/PR/8/34 HA aminoacidic sequence

cHis34 according to coding sequence numbering of (H3N2) A/Aichi/2/68 (GenBank accession number P03437)

dAsn54 on A/Aichi/2/68. For this residue two HA mutants were generated: Asn45Ala and Asn45His. See main text for details

eLys66 according to coding sequence numbering of (H3N2) A/Aichi/2/68 (GenBank accession number P03437)

fIle78 according to coding sequence numbering of (H3N2) A/Aichi/2/68 (GenBank accession number P03437)

gIle363 on A/Aichi/2/68

hAsp364 on A/Aichi/2/68
